# Supplementary material
Source: publisher site journal article supplement (https://kjim.org/upload/media/kjim-2024-041-Supplementary-Table-5.pdf)
Supplement: Supplementary file 1 [file kjim-2024-041-Supplementary-Table-5.pdf]

**Supplementary Table 5. Univariate and multivariate analysis of factors for early mortality**

| Characteristic                      | Univariate analysis |                | Multivariate analysis |                |
|-------------------------------------|---------------------|----------------|-----------------------|----------------|
|                                     | OR (95% CI)         | <i>p</i> value | OR (95% CI)           | <i>p</i> value |
| Age ≥ 84 yr                         | 1.63 (0.74–3.58)    | 0.227          |                       |                |
| Sex, female                         | 1.19 (0.55–2.59)    | 0.653          |                       |                |
| ECOG PS > 2                         | 2.71 (1.23–5.98)    | 0.014          | 1.63 (0.66–4.03)      | 0.287          |
| CCI > 4                             | 1.14 (0.47–2.75)    | 0.777          |                       |                |
| ISS III                             | 1.72 (0.69–4.25)    | 0.243          |                       |                |
| R-ISS III                           | 2.38 (0.94–6.01)    | 0.068          |                       |                |
| Hemoglobin < 10 g/dL                | 2.00 (0.75–5.37)    | 0.169          |                       |                |
| Bone disease                        | 1.07 (0.47–2.75)    | 0.869          |                       |                |
| Calcium > 11 mg/dL                  | 5.25 (1.43–19.23)   | 0.012          | 2.16 (0.44–10.68)     | 0.346          |
| Creatinine > 2 mg/dL                | 2.70 (1.16–6.33)    | 0.022          | 2.54 (0.99–6.49)      | 0.052          |
| Platelet < 100 × 10 <sup>9</sup> /L | 1.85 (0.79–4.36)    | 0.158          |                       |                |
| Albumin < 3.5 g/dL                  | 2.09 (0.86–5.10)    | 0.106          |                       |                |
| LDH elevation                       | 1.52 (0.67–3.51)    | 0.318          |                       |                |
| High-risk cytogenetic abnormalities | 2.76 (0.74–10.31)   | 0.131          |                       |                |
| Chemotherapy                        | 0.14 (0.06–0.33)    | < 0.001        | 0.15 (0.06–0.36)      | < 0.001        |
| Fist line chemotherapy              |                     | 0.424          |                       |                |
| Bortezomib-based                    |                     | 1              |                       |                |
| Lenalidomide-based                  | 2.68 (0.39–18.00)   |                |                       |                |
| Alkylating agent-based              | 2.94 (0.57–15.06)   |                |                       |                |

ECOG PS, Eastern Cooperative Oncology Group Performance Status; CCI, Charlson comorbidity index; ISS, International Staging System; R-ISS, Revised International Staging System; LDH, lactate dehydrogenase.
